# Supplementary material
Source: PubMed Central journal article supplement (PMC4873347)

# Q-Q plot

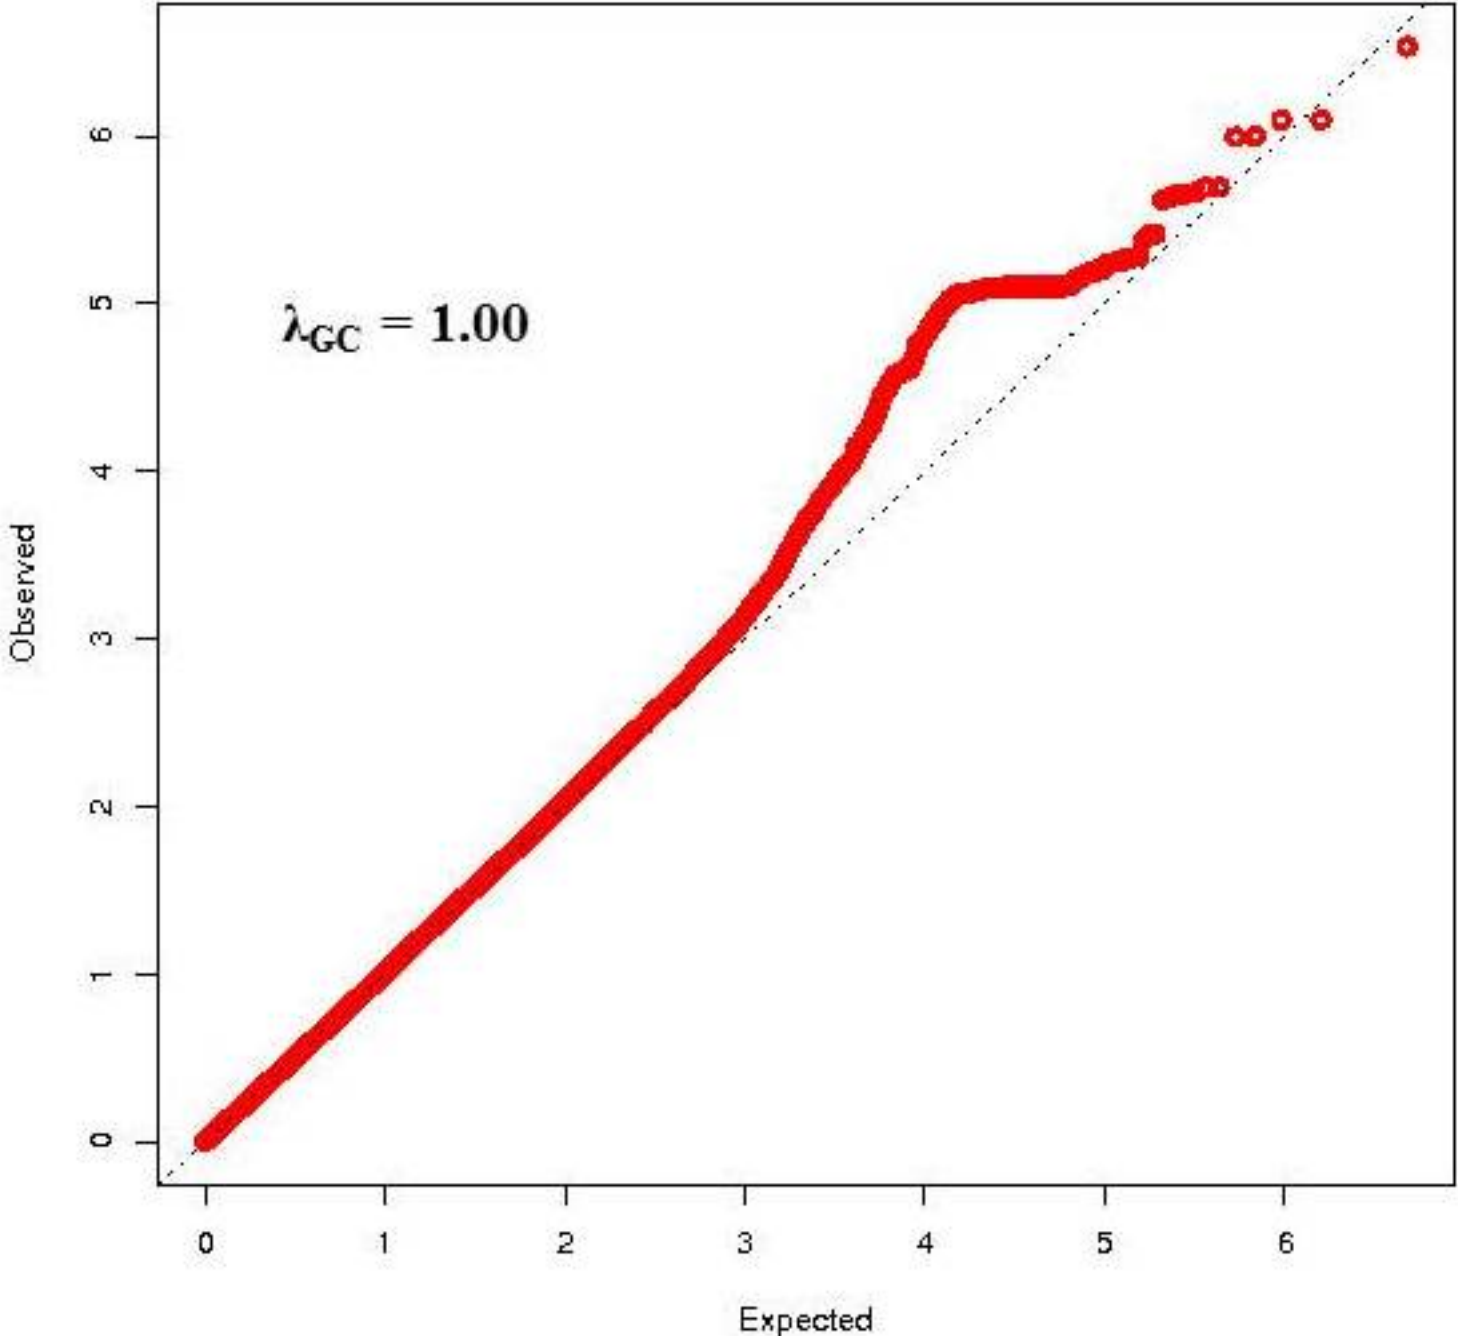

Supplement: NIHMS759417-supplement-5.pdf [file NIHMS759417-supplement-5.pdf]

# Manhattan plot

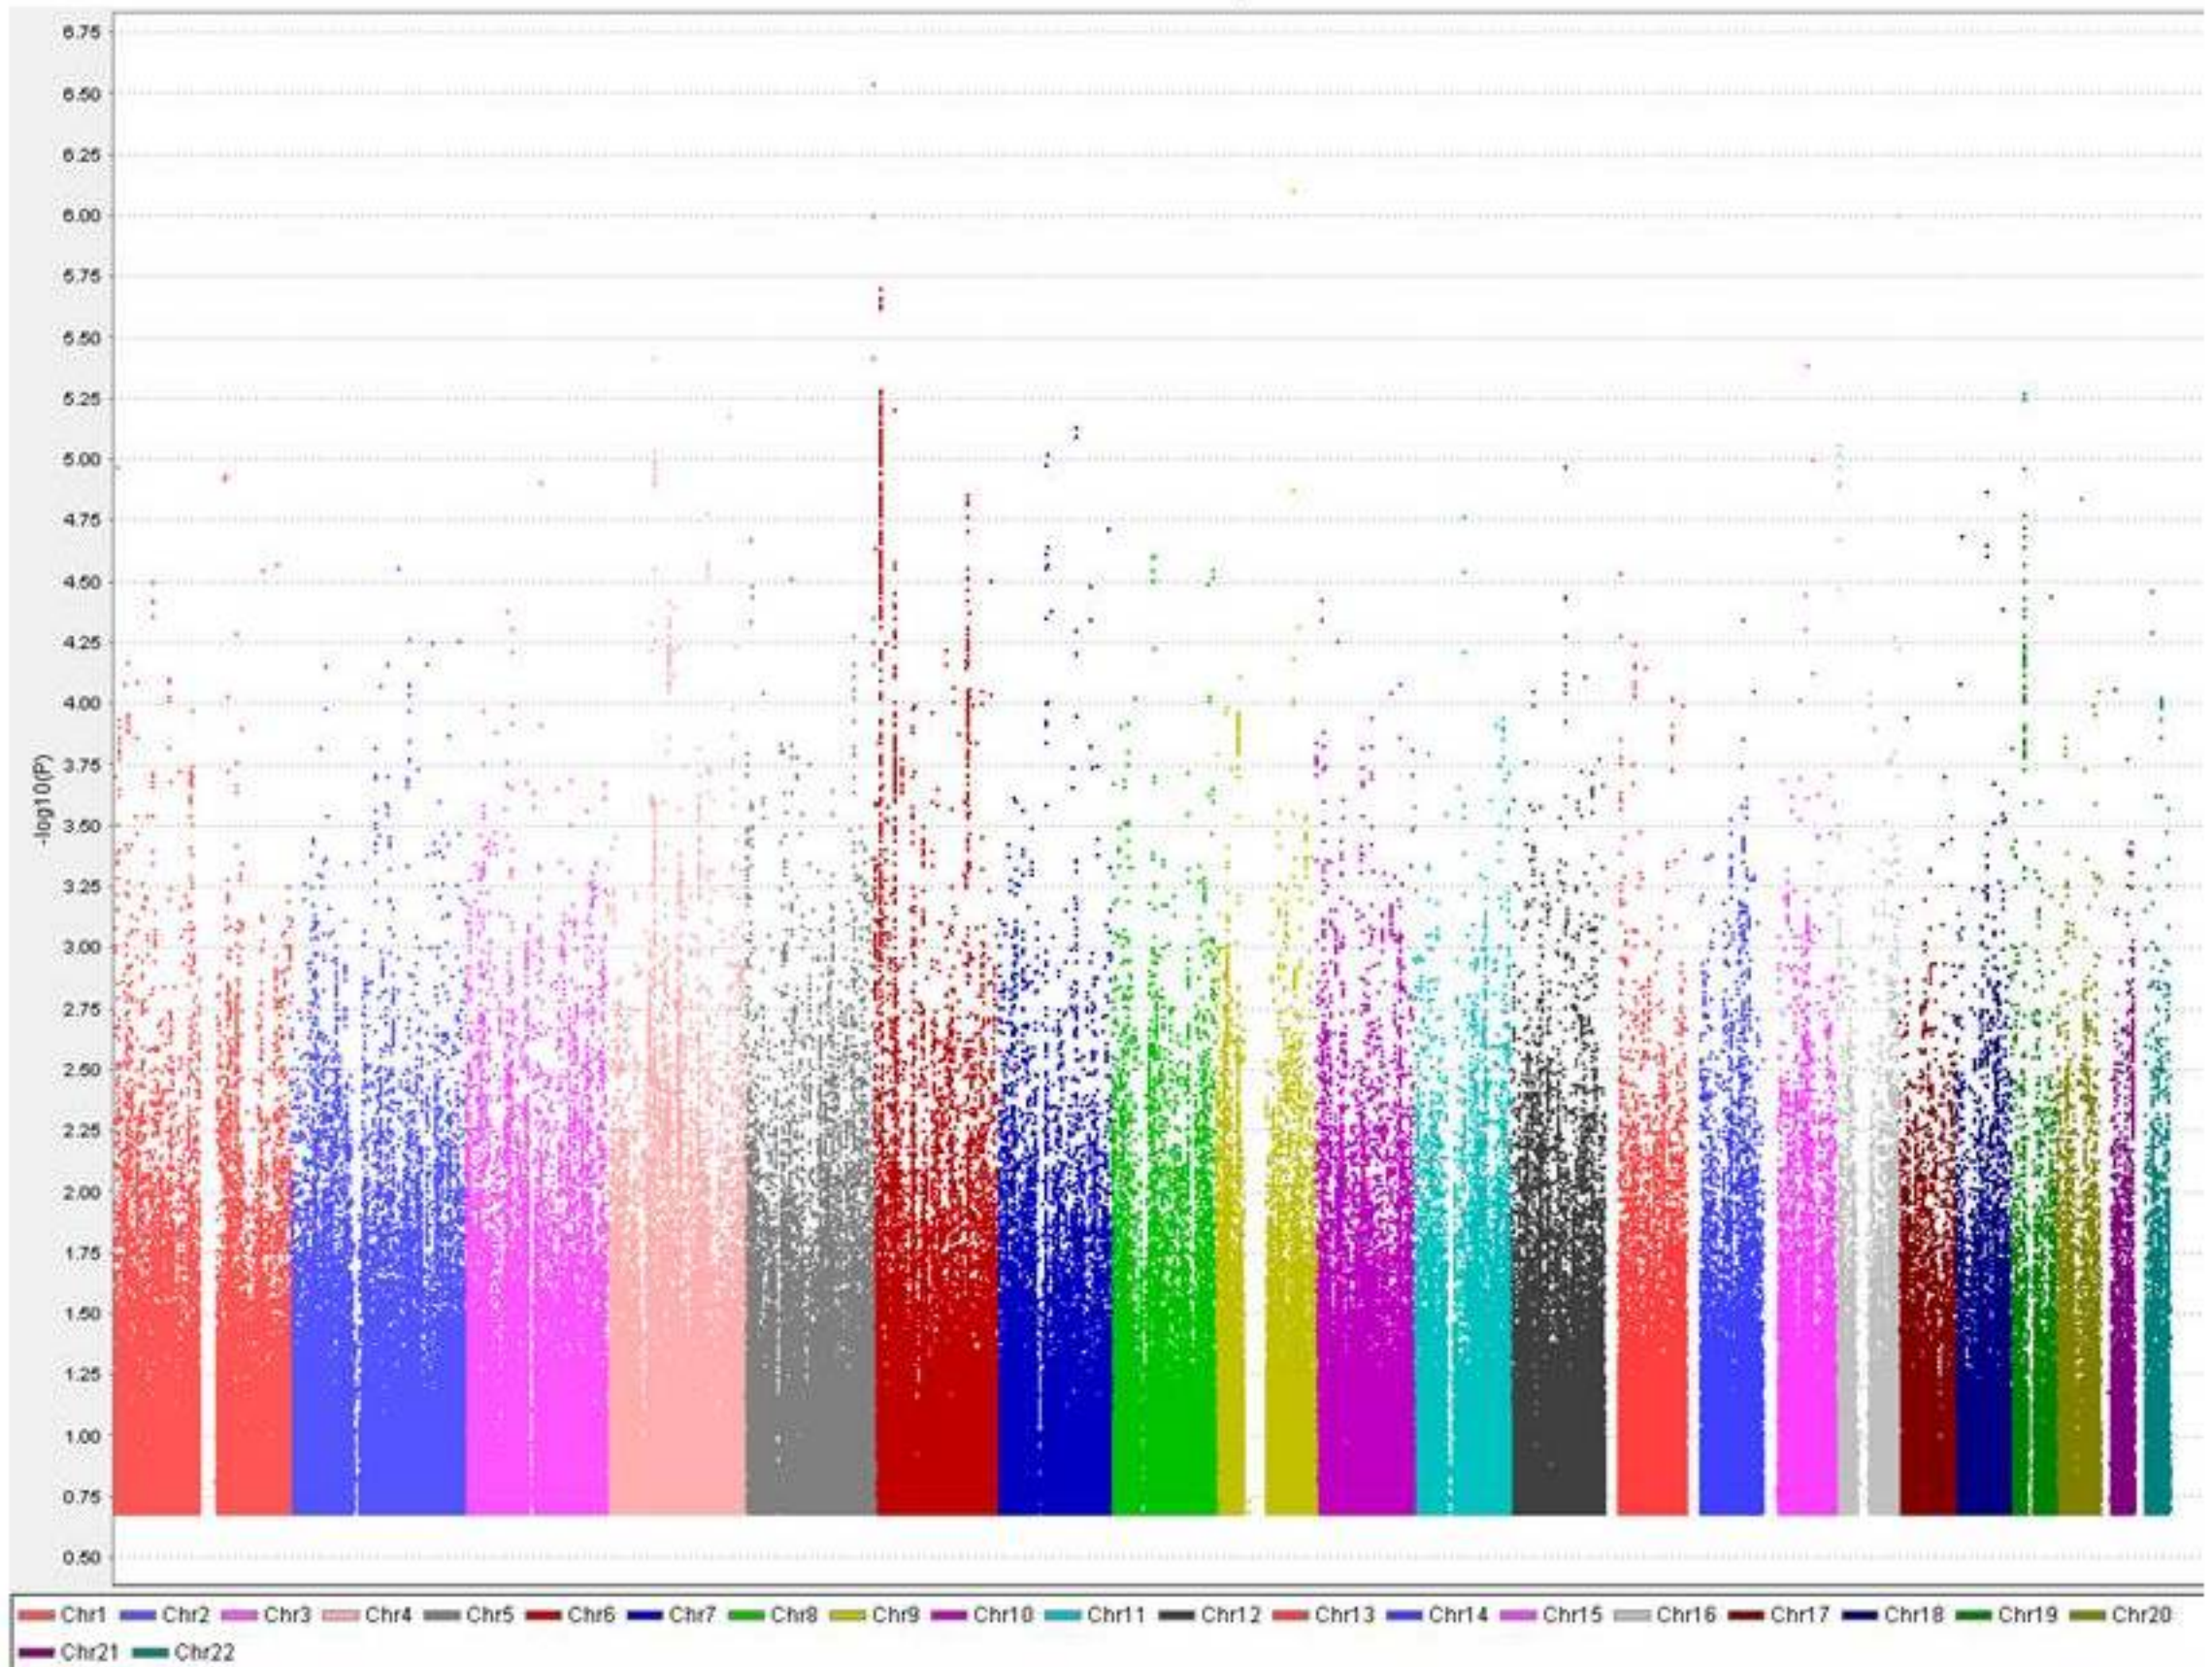

Supplement: NIHMS759417-supplement-6.pdf [file NIHMS759417-supplement-6.pdf]
